# Supplementary material for: Genome-Wide and Follow-Up Studies Identify CEP68 Gene Variants Associated with Risk of Aspirin-Intolerant Asthma
Source: PLoS One. 2010 Nov 3;5(11):e13818. doi: 10.1371/journal.pone.0013818 (PMC2972220; doi:10.1371/journal.pone.0013818)
Supplement: Table S5 — Relation of the SNP genotypes in CEP68 to the decline on FEV1 in AIA and in ATA. (0.05 MB DOC) [file pone.0013818.s005.doc]

**Table S5.** Relation of the SNP genotypes in *CEP68* to the decline on FEV1 in AIA and in ATA.

|  | **SNP ID** | **C/C** | |  | **C/R** | |  | **R/R** | |  | ***P**** |
| --- | --- | --- | --- | --- | --- | --- | --- | --- | --- | --- | --- |
| **n** | **Decline of FEV1 (%)** |  | **n** | **Decline of FEV1 (%)** |  | **n** | **Decline of FEV1 (%)** |  |
| In AIA | rs2302647 C>T | 63 | 20.68 ± 14.99 |  | 68 | 26.69 ± 16.45 |  | 29 | 28.36 ± 16.39 |  | **0.02** |
|  | rs2252867 A>G | 59 | 21.18 ± 15.57 |  | 71 | 26.25 ± 16.02 |  | 30 | 27.55 ± 16.71 |  | 0.06 |
|  | rs12611491 A>G | 80 | 23.50 ± 15.59 |  | 69 | 27.06 ± 16.88 |  | 11 | 17.57 ± 12.76 |  | 0.97 |
|  | rs7572857 G>A | 126 | 22.63 ± 15.89 |  | 29 | 31.53 ± 15.61 |  | 5 | 34.80 ± 10.76 |  | **0.003** |
|  | rs2723087 T>A | 59 | 21.18 ± 15.57 |  | 71 | 26.25 ± 16.02 |  | 30 | 27.55 ± 16.71 |  | 0.06 |
|  | rs6741255 T>C | 58 | 21.27 ± 15.69 |  | 72 | 26.11 ± 15.95 |  | 30 | 27.55 ± 16.71 |  | 0.06 |
|  | rs10496123 G>A | 75 | 27.02 ± 16.57 |  | 72 | 22.20 ± 15.51 |  | 13 | 24.25 ± 15.85 |  | 0.22 |
|  |  |  |  |  |  |  |  |  |  |  |  |
| In ATA | rs2302647 C>T | 204 | 3.08 ± 4.84 |  | 185 | 3.95 ± 4.94 |  | 40 | 4.03 ± 4.35 |  | 0.07 |
|  | rs2252867 A>G | 198 | 3.07 ± 4.69 |  | 188 | 3.87 ± 5.07 |  | 43 | 4.28 ± 4.45 |  | 0.05 |
|  | rs12611491 A>G | 243 | 3.19 ± 4.62 |  | 162 | 3.96 ± 5.20 |  | 22 | 4.60 ± 4.42 |  | 0.07 |
|  | rs7572857 G>A | 363 | 3.50 ± 4.92 |  | 66 | 3.79 ± 4.43 |  | - | - |  | 0.53 |
|  | rs2723087 T>A | 198 | 3.07 ± 4.69 |  | 188 | 3.87 ± 5.07 |  | 43 | 4.28 ± 4.45 |  | 0.05 |
|  | rs6741255 T>C | 197 | 3.09 ± 4.71 |  | 192 | 3.82 ± 5.03 |  | 40 | 4.47 ± 4.51 |  | **0.04** |
|  | rs10496123 G>A | 188 | 3.74 ± 4.71 |  | 191 | 3.47 ± 4.91 |  | 50 | 3.09 ± 5.15 |  | 0.32 |

**P* values of regression analyses represent the co-dominant model adjusted for age at initial diagnosis, sex, smoking status and atopy.

C/C, C/R and R/R indicate the homozygote of the common allele, and the heterozygote and homozygote of the rare allele, respectively.

In case of AIA, data for decline of EFV1 in two patients were omitted. Decline of FEV1 represents mean ± SE value.
